# Supplementary material for: Reduced tidal volume-inflection point and elevated operating lung volumes during exercise in females with well-controlled asthma
Source: HighWire-hosted journal article supplement (doi:10.1136/bmjresp-2023-001791), 2023-12-01
Supplement: bmjresp-2023-001791supp001_data_supplement.pdf [file bmjresp-2023-001791supp001_data_supplement.pdf]

Supplement: V<sub>T</sub>-inflection and dyspnea in females with asthma

1 **Supplement: Reduced tidal volume inflection point and elevated operating lung volumes in**  
2 **well-controlled females with asthma**

3

4 Andrew R. Brotto<sup>1,2</sup>, Devin B. Phillips<sup>1,2,3</sup>, Samira D. Rowland<sup>1,2</sup>, Linn E. Moore<sup>1,2</sup>, Eric Wong<sup>1</sup>,  
5 Michael K. Stickland<sup>1</sup>

6

7 <sup>1</sup>Division of Pulmonary Medicine, Faculty of Medicine and Dentistry, University of Alberta,  
8 Edmonton, AB

9 <sup>2</sup>Faculty of Kinesiology, Sport, and Recreation, University of Alberta, Edmonton, AB

10 <sup>3</sup>School of Kinesiology and Health Science, Faculty of Health, York University, Toronto, ON

11

12 **Running title:** Supplement: V<sub>T</sub>-inflection and dyspnea in females with asthma

13

14 **Corresponding author:**

15 Dr. Michael K. Stickland\*

16 3-135 Clinical Sciences Building, University of Alberta

17 8440 112 St NW, Edmonton, AB T6G 2B7

18 Email: [michael.stickland@ualberta.ca](mailto:michael.stickland@ualberta.ca)

19 Phone number: 1-780-492-3995

20 Fax number: 1-780-492-4483

Supplement:  $V_T$ -inflection and dyspnea in females with asthma21 **Results**

22 Male participant characteristics can be found in Supplementary Table 1. Pulmonary function pre-  
23 bronchodilator, post-bronchodilator, and following cardiopulmonary exercise test (CPET) can be  
24 found in Supplementary Table 2. Males with and without asthma had a significant increase in  
25 forced expired volume in 1 second following CPET due to exercise induced bronchodilation (1).

26 *Ventilatory and metabolic responses to exercise*

27 Male metabolic and ventilatory responses at highest equivalent workload (150W), the tidal volume  
28 ( $V_T$ )-inflection point, and peak exercise can be found in Supplementary Table 3. Ventilation during  
29 submaximal exercise was not significantly different between males with asthma and male controls  
30 ( $p=0.56$ ) as both breathing frequency and  $V_T$  were not significantly different between the two  
31 groups ( $p=0.07$  and  $p=0.16$ , respectively) (Supplementary Figure 1A and 1B).

32 When  $V_T$ -inflection is expressed as a percent of  $\dot{V}O_{2peak}$ , there was no significant difference  
33 between female controls and females with asthma (Control:  $81 \pm 9\%$  vs. Asthma:  $77 \pm 10\%$ ;  $p=$   
34  $0.155$ ). However, a post-hoc analysis of the data suggests the current study was underpowered to  
35 find significance ( $\beta=0.42$ ) and future exploration could be beneficial.

36 Females with asthma did not demonstrate ventilatory efficiency impairments as compared with  
37 female controls as  $\dot{V}_E/\dot{V}CO_2$  at peak exercise and the lowest 30-seconds (Nadir) were not  
38 significantly different between females with asthma and controls ( $p=0.595$  and  $p=0.312$ ,  
39 respectively). Further, the  $\dot{V}_E/\dot{V}CO_{2slope}$  was not significantly different between conditions  
40 ( $p=0.708$ ), and the y-intercept showed no significant group differences ( $p=0.934$ ). Lastly, end-tidal  
41  $PCO_2$  at peak exercise was not different between females with asthma and controls ( $p=0.336$ ).

Supplement:  $V_T$ -inflection and dyspnea in females with asthma

42 Similar to females with asthma,  $\dot{V}_E/\dot{V}CO_2$  in males with asthma were not different between groups  
43 at peak exercise ( $p=0.29$ ) or the lowest 30-seconds (Nadir) ( $p=0.23$ ). Further,  $\dot{V}_E/\dot{V}CO_{2slope}$  was not  
44 significantly different between males with asthma and male controls (Control:  $23.1 \pm 2.7$  vs.  
45 Asthma:  $22.4 \pm 3.0$ ;  $p=0.48$ ). End-tidal  $PCO_2$  at peak exercise was also not different between the  
46 two groups ( $p=0.61$ ).

47 *Perceptual responses to exercise*

48 The dyspnea-ventilation slope was not significantly different between females with asthma and  
49 female controls (Control:  $0.07 \pm 0.03$  vs. Asthma:  $0.08 \pm 0.02$ ;  $p=0.13$ ) (Figure 2C). Similarly,  
50 the dyspnea-ventilation slope was not different between males with asthma and male controls  
51 (Control:  $0.06 \pm 0.02$  vs. Asthma:  $0.06 \pm 0.01$ ;  $p=0.46$ ) (Supplementary Figure 2C).

52 In females with asthma, 13 participants terminated the test due to “leg discomfort”, while 3  
53 participants terminated the test due to “both leg and breathing discomfort”. In comparison, 14  
54 female control participants terminated the test due to “leg discomfort” and 2 participants  
55 terminated the test due to “both leg and breathing discomfort”. The selection frequency of the  
56 reason for termination was not significantly different ( $p=0.50$ ). In males with asthma, 12  
57 participants terminated the test due to “leg discomfort”, while 4 participants terminated the test  
58 due to “breathing discomfort”. In comparison, 13 male control participants terminated the test due  
59 to “leg discomfort” and 3 participants terminated the test due to “both leg and breathing  
60 discomfort”. The selection frequency of the reason for termination was significantly different  
61 ( $p=0.02$ ).

Supplement:  $V_T$ -inflection and dyspnea in females with asthma

- 62 1. Rossman MJ, Petrics G, Klansky A, Craig K, Irvin CG, Haverkamp HC. Exercise-  
63 induced Bronchodilation Equalizes Exercise Ventilatory Mechanics despite Variable Baseline  
64 Airway Function in Asthma. *Med Sci Sports Exerc.* 2022;54(2):258-66. doi:  
65 10.1249/MSS.0000000000002793. PubMed PMID: 34559730.

Supplement: V<sub>T</sub>-inflection and dyspnea in females with asthma

### Figure Captions

*Supplementary Figure 1.* Ventilatory and lung mechanic responses to exercise in males with asthma and male controls. This graph shows data means  $\pm$  standard deviation. \*Signifies  $p < 0.05$  between male controls and males with asthma.

*Supplementary Figure 2.* Dyspnea response to exercise in males with asthma and male controls. This graph shows data means  $\pm$  standard deviation. \*Signifies  $p < 0.05$  between male controls and males with asthma.

Supplement: V<sub>T</sub>-inflection and dyspnea in females with asthma

Supplementary Table 1. Male participant characteristics

| Variable                         | Control     | Asthma      | p-value     |
|----------------------------------|-------------|-------------|-------------|
| n                                | 16          | 16          |             |
| Age (years)                      | 24 ± 3      | 24 ± 5      | 0.77        |
| Height (m)                       | 1.78 ± 0.05 | 1.78 ± 0.08 | 0.32        |
| Weight (kg)                      | 79.5 ± 14.0 | 77.8 ± 11.9 | 0.26        |
| BMI (kg·m <sup>-2</sup> )        | 24.9 ± 3.1  | 24.5 ± 3.0  | 0.44        |
| ACQ Score                        | 0.0 ± 0.0   | 0.7 ± 0.8   | <b>0.01</b> |
| Allergies (%)                    | 20          | 63          |             |
| Medications                      |             |             |             |
| SABA (%)                         | 0           | 50          |             |
| ICS (%)                          | 0           | 31          |             |
| Combination (%)                  | 0           | 13          |             |
| Airway Evaluation                |             |             |             |
| Positive Reversibility           | 0/16        | 10/16       |             |
| Mean FEV <sub>1</sub> Change (%) | 6 ± 3       | 10 ± 5      | <b>0.02</b> |
| Positive MCT (%)                 | 0/16        | 6/16        |             |
| Mean FEV <sub>1</sub> Change (%) | 3 ± 2       | 14 ± 8      | <b>0.00</b> |
| Positive ECT (%)                 | 0/16        | 1/16        |             |
| Mean FEV <sub>1</sub> Change (%) | 2 ± 1       | 4 ± 4       | 0.18        |

Values are expressed as mean ± SD. BMI: body mass index; ACQ: asthma control questionnaire; SABA: short-acting beta agonist; ICS: inhaled corticosteroid; MCT: methacholine challenge test; ECT: exercise challenge test; FEV<sub>1</sub>: forced expired volume in 1-second. Note: positive reversibility defined as a change in FEV<sub>1</sub> by 12% following bronchodilator

66

Supplement: V<sub>T</sub>-inflection and dyspnea in females with asthma

Supplementary Table 2. Pulmonary function with and without bronchodilator and following exercise in male control and asthma

|                                                  | Control     |                          |                          | Asthma       |                          |                          |
|--------------------------------------------------|-------------|--------------------------|--------------------------|--------------|--------------------------|--------------------------|
|                                                  | Pre-BD      | Post-BD                  | Post-CPET                | Pre-BD       | Post-BD                  | Post-CPET                |
| <b>Spirometry</b>                                |             |                          |                          |              |                          |                          |
| FVC (L)                                          | 6.06 ± 1.03 | 6.16 ± 0.99              | 6.31 ± 1.15              | 5.62 ± 0.86  | 5.65 ± 0.92              | 5.53 ± 0.70              |
| FVC (% predicted)                                | 107 ± 12    | 109 ± 11                 | 110 ± 17                 | 105 ± 15     | 107 ± 16                 | 107 ± 16                 |
| FEV <sub>1</sub> (L)                             | 4.83 ± 0.72 | 5.10 ± 0.74 <sup>§</sup> | 5.20 ± 0.56 <sup>§</sup> | 4.03 ± 0.62* | 4.41 ± 0.67 <sup>§</sup> | 4.15 ± 0.71 <sup>§</sup> |
| FEV <sub>1</sub> (% predicted)                   | 101 ± 13    | 108 ± 9 <sup>§</sup>     | 109 ± 10 <sup>§</sup>    | 90 ± 18*     | 99 ± 17 <sup>§</sup>     | 96 ± 17 <sup>§</sup>     |
| FEV <sub>1</sub> /FVC                            | 80 ± 4      | 83 ± 4 <sup>§</sup>      | 84 ± 9 <sup>§</sup>      | 72 ± 9*      | 79 ± 9 <sup>§</sup>      | 75 ± 9 <sup>§</sup>      |
| FEV <sub>1</sub> /FVC (% predicted)              | 95 ± 5      | 99 ± 5 <sup>§</sup>      | 99 ± 11 <sup>§</sup>     | 85 ± 9*      | 92 ± 9 <sup>§</sup>      | 89 ± 10 <sup>§</sup>     |
| <b>Lung Volumes</b>                              |             |                          |                          |              |                          |                          |
| TLC (L)                                          | 7.69 ± 1.14 |                          |                          | 7.76 ± 1.33  |                          |                          |
| TLC (% predicted)                                | 107 ± 15    |                          |                          | 113 ± 21     |                          |                          |
| RV (L)                                           | 1.32 ± 0.50 |                          |                          | 1.43 ± 0.28  |                          |                          |
| RV (% predicted)                                 | 86 ± 32     |                          |                          | 95 ± 15      |                          |                          |
| IC (L)                                           | 3.88 ± 0.74 |                          |                          | 3.57 ± 0.67  |                          |                          |
| IC (% predicted)                                 | 104 ± 16    |                          |                          | 100 ± 16     |                          |                          |
| <b>Diffusion Capacity</b>                        |             |                          |                          |              |                          |                          |
| DLCO (ml·min <sup>-1</sup> ·mmHg <sup>-1</sup> ) | 37.6 ± 4.2  |                          |                          | 35.3 ± 5.7   |                          |                          |
| DLCO (% predicted)                               | 110 ± 10    |                          |                          | 107 ± 11     |                          |                          |

Values expressed as mean ± standard deviation. FVC: forced vital capacity; FEV<sub>1</sub>: forced expired volume in 1 second; TLC: total lung capacity; RV: reserve volume; IC: inspiratory capacity; DLCO: diffusing capacity of carbon monoxide; BD: bronchodilator; CPET: cardiopulmonary exercise test. \*Signifies p<0.05 as compared to controls. <sup>§</sup>Signifies p<0.05 as compared to Pre-BD.

67

68

Supplement: V<sub>T</sub>-inflection and dyspnea in females with asthma

Supplementary Table 3. Metabolic and ventilatory responses in males at 150W, tidal volume inflection point, and peak exercise.

|                                        | 150 Watts   |             | V <sub>T</sub> -Inflection Point |             | Peak         |              |
|----------------------------------------|-------------|-------------|----------------------------------|-------------|--------------|--------------|
|                                        | Control     | Asthma      | Control                          | Asthma      | Control      | Asthma       |
| $\dot{V}O_{2peak}$ (L/min)             | 2.20 ± 0.24 | 2.28 ± 0.25 | 3.21 ± 0.69                      | 3.07 ± 0.72 | 3.90 ± 0.68  | 3.78 ± 0.60  |
| $\dot{V}O_{2peak}$ (ml/kg/min)         | 26.8 ± 3.0  | 29.8 ± 4.4  | 38.9 ± 7.0                       | 40.0 ± 7.6  | 47.4 ± 7.0   | 49.0 ± 8.4   |
| $\dot{V}O_{2peak}$ (% predicted)       | ---         | ---         | ---                              | ---         | 134 ± 19     | 133 ± 19     |
| $\dot{V}_E$ (L/min)                    | 56.2 ± 9.6  | 62.4 ± 10.4 | 93.7 ± 25.3                      | 91.4 ± 27.8 | 139.6 ± 26.6 | 141.7 ± 32.4 |
| Power Output (W)                       | 150 ± 0     | 150 ± 0     | 220 ± 44                         | 206 ± 47    | 278 ± 43     | 258 ± 50     |
| RER                                    | 1.01 ± 0.08 | 1.04 ± 0.07 | 1.09 ± 0.06                      | 1.08 ± 0.08 | 1.17 ± 0.06  | 1.15 ± 0.07  |
| $\dot{V}_E/\dot{V}CO_2$                | 25 ± 2      | 26 ± 2      | 27 ± 3                           | 27 ± 3      | 32 ± 4       | 33 ± 4       |
| $\dot{V}CO_2$ (L/min)                  | 2.21 ± 0.23 | 2.38 ± 0.28 | 3.50 ± 0.73                      | 3.33 ± 0.86 | 4.40 ± 0.64  | 4.25 ± 0.71  |
| P <sub>ET</sub> CO <sub>2</sub> (mmHg) | 42.6 ± 3.1  | 40.8 ± 3.3  | 40.5 ± 4.2                       | 39.4 ± 4.3  | 34.6 ± 3.5   | 33.8 ± 4.6   |
| fb (breaths/min)                       | 24 ± 5      | 29 ± 7      | 31 ± 6                           | 34 ± 8      | 46 ± 9       | 52 ± 11      |
| V <sub>T</sub> (L)                     | 2.44 ± 0.43 | 2.30 ± 0.36 | 3.05 ± 0.58                      | 2.78 ± 0.65 | 3.10 ± 0.51  | 2.74 ± 0.43* |
| IC (L)                                 | 3.82 ± 0.77 | 3.61 ± 0.54 | 3.95 ± 0.73                      | 3.68 ± 0.63 | 3.89 ± 0.41  | 3.46 ± 0.47* |
| IC (%TLC)                              | 49 ± 5      | 47 ± 6      | 51 ± 5                           | 49 ± 7      | 51 ± 6       | 45 ± 6       |
| EELV (%TLC)                            | 51 ± 5      | 53 ± 6      | 49 ± 5                           | 51 ± 7      | 49 ± 6       | 55 ± 6       |
| IRV (%TLC)                             | 16 ± 4      | 17 ± 4      | 11 ± 5                           | 12 ± 4      | 11 ± 6       | 9 ± 5        |
| V <sub>T</sub> /IC (%)                 | 67 ± 8      | 64 ± 8      | 78 ± 10                          | 76 ± 12     | 80 ± 11      | 80 ± 10      |
| EILV (%TLC)/ $\dot{V}_E$               | 1.55 ± 0.32 | 1.36 ± 0.20 | 1.04 ± 0.28                      | 1.06 ± 0.33 | 0.67 ± 0.11  | 0.73 ± 0.16  |
| EFL (%)                                | 0 ± 0       | 13 ± 28*    | 10 ± 23                          | 23 ± 28     | 28 ± 27      | 54 ± 28*     |
| HR (beats/min)                         | 137 ± 13    | 145 ± 14    | 167 ± 14                         | 165 ± 22    | 186 ± 7      | 181 ± 15     |
| SpO <sub>2</sub> (%)                   | 95 ± 4      | 96 ± 4      | 95 ± 2                           | 95 ± 4      | 94 ± 4       | 96 ± 2       |
| Dyspnea                                | 2.1 ± 1.3   | 2.9 ± 1.1   | 4.1 ± 1.6                        | 4.8 ± 1.5   | 7.1 ± 1.8    | 7.7 ± 1.5    |
| Leg Discomfort                         | 3.3 ± 1.4   | 3.8 ± 1.1   | 5.9 ± 2.1                        | 5.9 ± 1.6   | 9.0 ± 1.3    | 9.1 ± 1.2    |

Values are expressed as mean ± standard deviation.  $\dot{V}O_2$ : rate of oxygen consumption;  $\dot{V}_E$ : minute ventilation; RER: respiratory exchange ratio;  $\dot{V}CO_2$ : rate of carbon dioxide production; P<sub>ET</sub>CO<sub>2</sub>: partial pressure of end-tidal carbon dioxide; fb: breathing frequency; V<sub>T</sub>: tidal volume; IC: inspiratory capacity; EELV: end-expiratory lung volume; EILV: end-inspiratory lung volume; IRV: inspiratory reserve volume; EFL: expiratory flow limitation; HR: heart rate; SpO<sub>2</sub>: arterial oxygen saturation. \*Signifies p<0.05 between asthma and control.



Supplement: V<sub>T</sub>-inflection and dyspnea in females with asthma

Supplementary Table 4. Metabolic and ventilatory responses in females at 125W, tidal volume inflection point, and peak exercise.

|                                        | 125 Watts   |              | V <sub>T</sub> -inflection Point |              | Peak         |              |
|----------------------------------------|-------------|--------------|----------------------------------|--------------|--------------|--------------|
|                                        | Control     | Asthma       | Control                          | Asthma       | Control      | Asthma       |
| $\dot{V}O_{2peak}$ (L/min)             | 1.71 ± 0.12 | 1.84 ± 0.19  | 2.19 ± 0.42                      | 1.85 ± 0.35* | 2.70 ± 0.29  | 2.40 ± 0.35* |
| $\dot{V}O_{2peak}$ (ml/kg/min)         | 27.9 ± 3.3  | 30.6 ± 5.6   | 35.7 ± 6.7                       | 30.6 ± 6.2*  | 44.0 ± 5.3   | 39.8 ± 7.1   |
| $\dot{V}O_{2peak}$ (% predicted)       | ---         | ---          | ---                              | ---          | 156 ± 18     | 139 ± 20*    |
| $\dot{V}_E$ (L/min)                    | 48.9 ± 6.3  | 56.6 ± 8.6*  | 70.2 ± 16.5                      | 57.7 ± 12.3* | 110.1 ± 14.2 | 91.6 ± 15.7* |
| Power Output (W)                       | 125 ± 0     | 125 ± 0      | 163 ± 33                         | 128 ± 26*    | 216 ± 22     | 177 ± 25*    |
| RER                                    | 1.03 ± 0.07 | 1.07 ± 0.07  | 1.11 ± 0.07                      | 1.07 ± 0.06  | 1.21 ± 0.05  | 1.17 ± 0.08  |
| $\dot{V}_E/\dot{V}CO_2$                | 28 ± 2      | 29 ± 3       | 28.8 ± 2.0                       | 29.2 ± 2.1   | 34 ± 3       | 33 ± 3       |
| $\dot{V}CO_2$ (L/min)                  | 1.75 ± 0.17 | 1.95 ± 0.17* | 2.43 ± 0.50                      | 1.98 ± 0.41* | 3.25 ± 0.26  | 2.77 ± 0.38* |
| P <sub>ET</sub> CO <sub>2</sub> (mmHg) | 38.7 ± 2.6  | 37.0 ± 3.3   | 37.1 ± 2.6                       | 36.9 ± 2.5   | 31.9 ± 2.5   | 32.7 ± 2.4   |
| fb (breaths/min)                       | 27 ± 4      | 33 ± 7*      | 32 ± 6                           | 32 ± 6       | 49 ± 7       | 46 ± 8       |
| V <sub>T</sub> (L)                     | 1.87 ± 0.25 | 1.76 ± 0.21  | 2.21 ± 0.39                      | 1.82 ± 0.31* | 2.27 ± 0.32  | 2.01 ± 0.20* |
| IC (L)                                 | 2.87 ± 0.42 | 2.54 ± 0.30* | 2.90 ± 0.42                      | 2.57 ± 0.25* | 2.87 ± 0.40  | 2.51 ± 0.31* |
| IC (%TLC)                              | 53 ± 7      | 51 ± 5       | 52 ± 7                           | 51 ± 7       | 53 ± 7       | 51 ± 6       |
| EELV (%TLC)                            | 47 ± 7      | 49 ± 5       | 48 ± 7                           | 49 ± 7       | 47 ± 7       | 50 ± 7       |
| IRV (%TLC)                             | 18 ± 5      | 15 ± 5*      | 12 ± 6                           | 15 ± 4       | 11 ± 5       | 10 ± 4       |
| Vt/IC (%)                              | 66 ± 7      | 71 ± 10      | 77 ± 10                          | 71 ± 8       | 80 ± 8       | 79 ± 7       |
| EILV (%TLC)/ $\dot{V}_E$               | 1.70 ± 0.24 | 1.56 ± 0.24  | 1.34 ± 0.36                      | 1.53 ± 0.30  | 0.83 ± 0.11  | 1.01 ± 0.17* |
| EFL (%)                                | 0 ± 0       | 14 ± 27*     | 3 ± 10                           | 28 ± 21*     | 16 ± 25      | 39 ± 33*     |
| HR (beats/min)                         | 151 ± 15    | 162 ± 14*    | 169 ± 15                         | 162 ± 17     | 185 ± 10     | 182 ± 12     |
| SpO <sub>2</sub> (%)                   | 96 ± 2      | 97 ± 2       | 97 ± 3                           | 97 ± 2       | 96 ± 4       | 96 ± 2       |
| Dyspnea                                | 2.1 ± 1.2   | 3.4 ± 1.0*   | 3.5 ± 1.8                        | 3.8 ± 1.2    | 7.1 ± 2.0    | 7.4 ± 2.3    |
| Leg Discomfort                         | 2.9 ± 0.8   | 4.6 ± 1.2*   | 4.5 ± 1.7                        | 4.9 ± 1.9    | 8.7 ± 1.7    | 9.1 ± 1.0    |

Values are expressed as mean ± standard deviation.  $\dot{V}O_2$ : rate of oxygen consumption;  $\dot{V}_E$ : minute ventilation; RER: respiratory exchange ratio;  $\dot{V}CO_2$ : rate of carbon dioxide production; P<sub>ET</sub>CO<sub>2</sub>: partial pressure of end-tidal carbon dioxide; fb: breathing frequency; V<sub>T</sub>: tidal volume; IC: inspiratory capacity; EELV: end-expiratory lung volume; EILV: end-inspiratory lung volume; IRV: inspiratory reserve volume; EFL: expiratory flow limitation; HR: heart rate; SpO<sub>2</sub>: arterial oxygen saturation. \*Signifies p<0.05 between asthma and control.
