# Supplementary figures and images for: Reduced tidal volume-inflection point and elevated operating lung volumes during exercise in females with well-controlled asthma
Source: HighWire-hosted journal article supplement (doi:10.1136/bmjresp-2023-001791), 2023-12-01

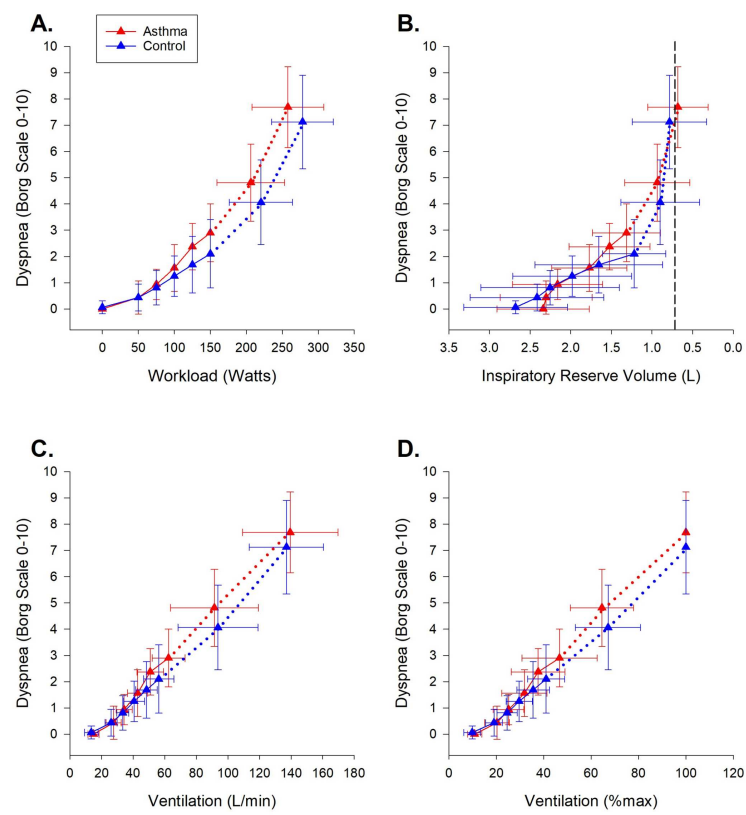

Supplement: bmjresp-2023-001791supp002_data_supplement.pdf [file bmjresp-2023-001791supp002_data_supplement.pdf]

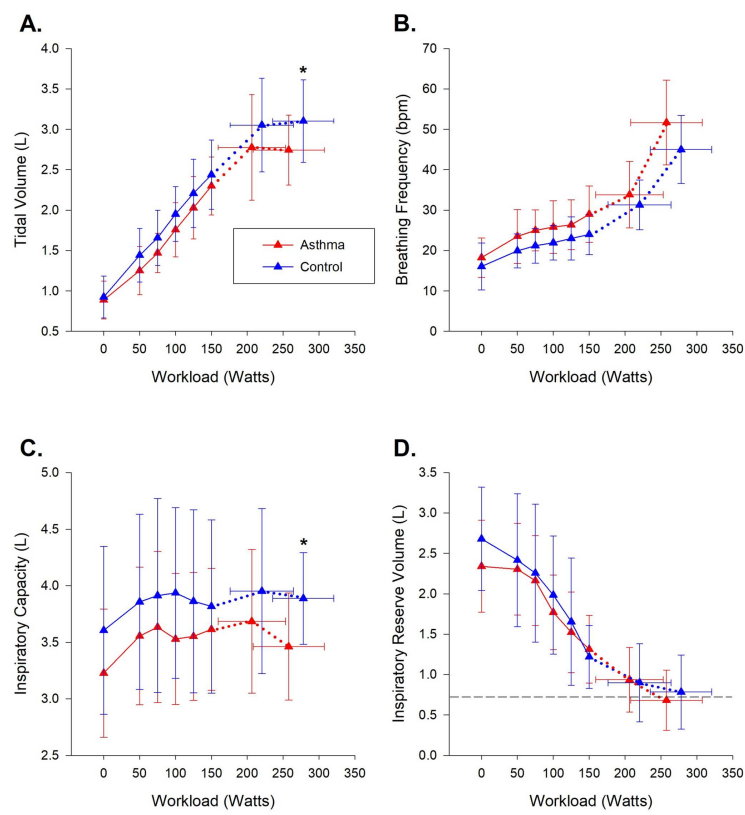

Supplement: bmjresp-2023-001791supp003_data_supplement.pdf [file bmjresp-2023-001791supp003_data_supplement.pdf]
